# Supplementary material
Source: PubMed Central journal article supplement (PMC3358763)
Supplement: ASN.2011111112_ASN2011111112SupplementaryData.pdf [file ASN.2011111112_ASN2011111112SupplementaryData.pdf]

## Supplementary Table Legends

### Supplementary Table 1: Risks for bias in included studies

We assessed study risk for bias according to recommendations from the Cochrane Collaboration<sup>27</sup>.

\* Whether the study reported methods to conceal the allocation sequence in sufficient detail to determine whether intervention allocations could have been predicted in advance of patient enrollment.

† Methods by which patients, investigators, or outcomes assessors are protected from being aware of the treatment allocations after patients are included in the study.

‡ Whether the study conducted the major analyses according to the patients' treatment assignment at the time of randomization.

§ Whether the study described the completeness of outcome data for the primary outcomes.

## **Supplementary Figure Legends**

**Supplementary Figure 1: Funnel plot of studies comparison steroids with controls on composite renal endpoint (end-stage kidney disease and/or either doubling in serum creatinine or halving of GFR)**

**Supplementary Figure 2: Adverse events reported in the included trials**  
CI, confidence interval; RR, relative risk.

**Supplementary Table 1: Risks for bias in included studies**

|                                           | Lai<br>1986 | Julian<br>1993 | Shoji<br>2000 | Katafushi<br>2003 | Pozzi<br>2004 | Hogg<br>2006 | Koike<br>2008 | Lv<br>2009 | Manno<br>2009 |
|-------------------------------------------|-------------|----------------|---------------|-------------------|---------------|--------------|---------------|------------|---------------|
| Allocation concealment*                   | Unclear     | Unclear        | Unclear       | Unclear           | Unclear       | Unclear      | Yes           | Yes        | Yes           |
| Blinding of patients†                     | No          | No             | No            | No                | No            | Yes          | No            | No         | No            |
| Blinding of investigators†                | No          | No             | No            | No                | No            | Yes          | No            | No         | No            |
| Blinding of outcome assessors†            | Unclear     | Unclear        | Unclear       | Unclear           | Unclear       | Unclear      | Unclear       | No         | Unclear       |
| Blinding of data analysts†                | Unclear     | Unclear        | Unclear       | Unclear           | Unclear       | Unclear      | Unclear       | No         | Unclear       |
| Analysis by intention-to-treat principle‡ | No          | No             | No            | No                | Yes           | Yes          | Yes           | Yes        | Yes           |
| Incomplete outcome data <10% §            | Yes         | Yes            | No            | No                | Yes           | No           | Yes           | Yes        | Yes           |

We assessed study risk for bias according to recommendations from the Cochrane Collaboration<sup>27</sup>.

\* Whether the study reported methods to conceal the allocation sequence in sufficient detail to determine whether intervention allocations could have been predicted in advance of patient enrollment.

† Methods by which patients, investigators, or outcomes assessors are protected from being aware of the treatment allocations after patients are included in the study.

‡ Whether the study conducted the major analyses according to the patients' treatment assignment at the time of randomization.

§ Whether the study described the completeness of outcome data for the primary outcomes.

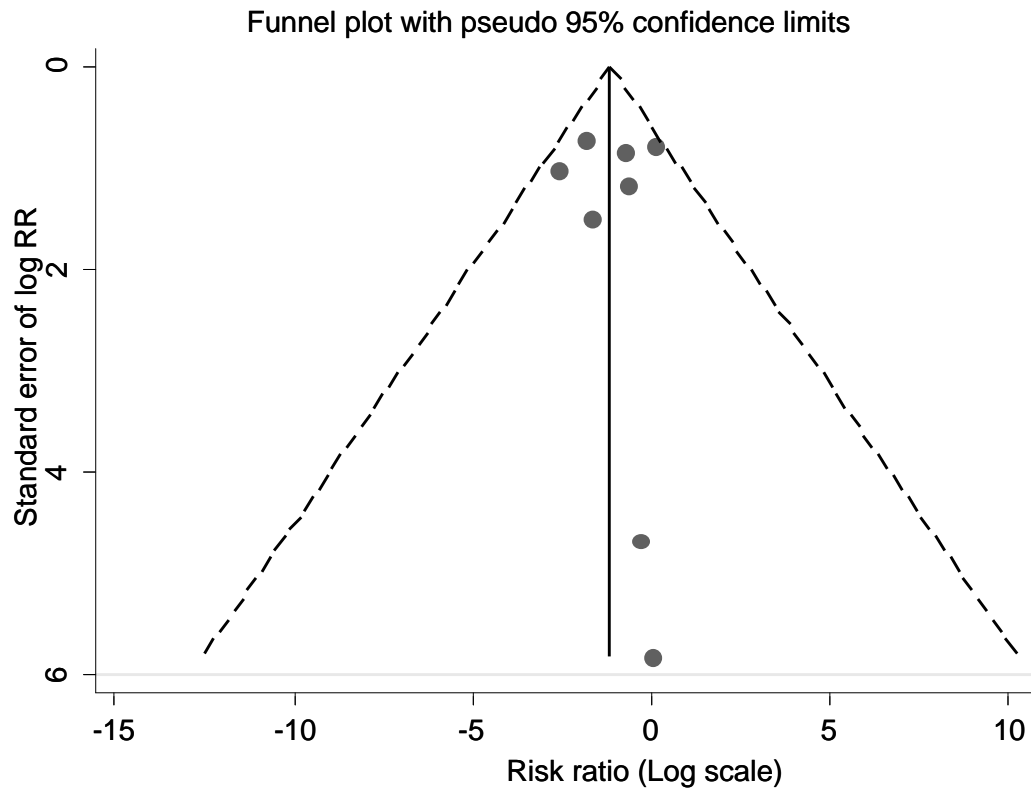

**Supplementary Figure 1: Funnel plot of studies comparison steroids with controls on composite renal endpoint (end-stage kidney disease and/or either of doubling in serum creatinine or halving of GFR)**

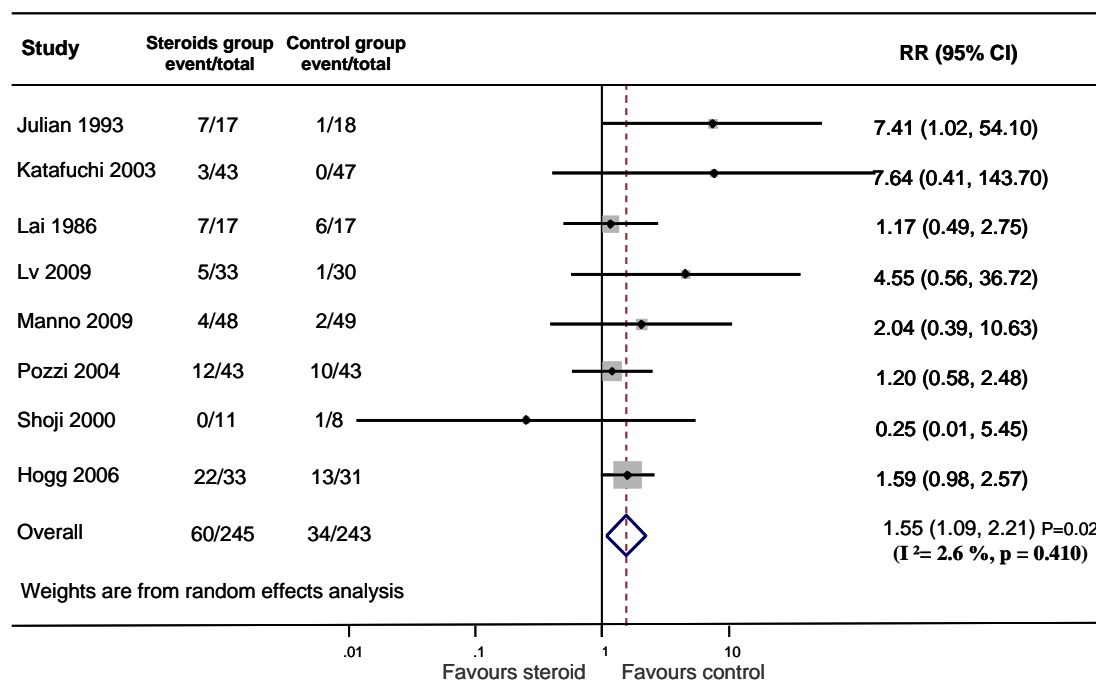

**Supplementary Figure 2: Adverse events reported in the included trials**  
 CI, confidence interval; RR, relative risk.
